# Supplementary material for: Nomograms and risk scores for predicting the risk of oral cancer in different sexes: a large-scale case-control study
Source: PubMed Central journal article supplement — J Cancer. 2018 Jun 22;9(14):2543–8. doi: 10.7150/jca.24431 (PMC6036893; doi:10.7150/jca.24431), 2018-06-22
Supplement: jcav09p2543s1.pdf [file jcav09p2543s1.pdf]

### Supplementary Figure

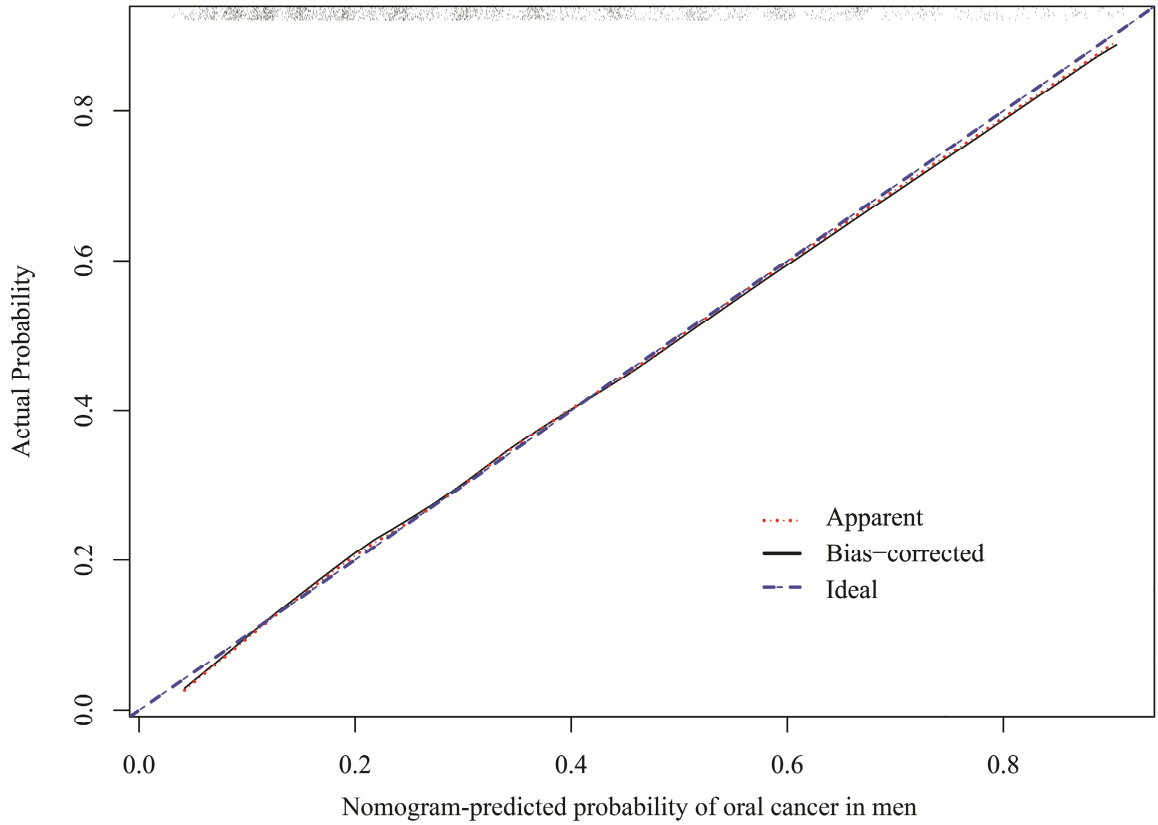

**Figure S1** Calibration plots for the predicted probabilities and the actual observation among men. The x-axis indicates the nomogram-predicted probability, and the y-axis demonstrates the actual observed probability.

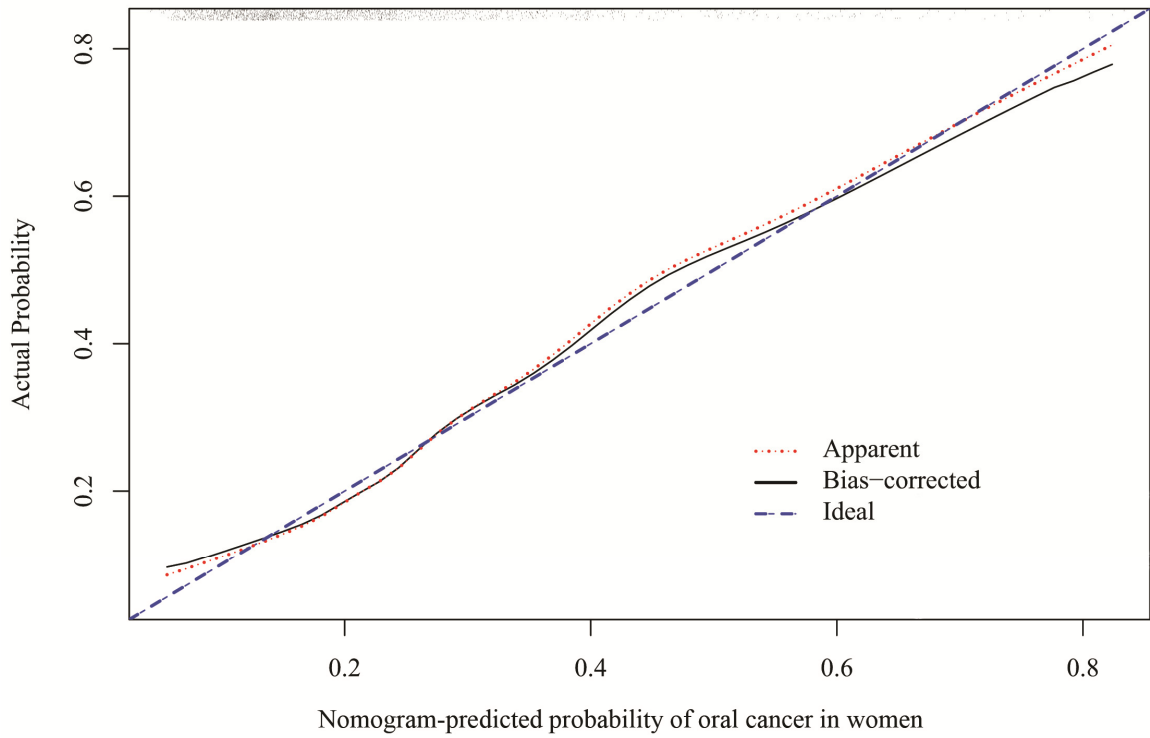

**Figure S2** Calibration plots for the predicted probabilities and the actual observation among women.

Supplementary Table 1 Smoking, alcohol drinking, tea and the risk of oral cancer

| Variable                 | Men            |                                         |                                         | Women          |                                         |                                         |
|--------------------------|----------------|-----------------------------------------|-----------------------------------------|----------------|-----------------------------------------|-----------------------------------------|
|                          | Cases/Controls | Model-1<br><i>OR(95%CI)<sup>a</sup></i> | Model-2<br><i>OR(95%CI)<sup>b</sup></i> | Cases/Controls | Model-1<br><i>OR(95%CI)<sup>a</sup></i> | Model-2<br><i>OR(95%CI)<sup>c</sup></i> |
| Smoking (pack-year)      |                |                                         |                                         |                |                                         |                                         |
| Never                    | 155/625        | 1.00                                    | 1.00                                    | 358/1320       | 1.00                                    | 1.00                                    |
| <20                      | 90/210         | 1.64(1.21-2.24)                         | 1.50(1.10-2.05)                         | 1/8            | 0.48(0.06-3.96)                         | 0.49(0.06-4.03)                         |
| 20~                      | 148/246        | 2.36(1.79-3.11)                         | 1.97(1.48-2.62)                         | 1/4            | 0.76(0.08-7.00)                         | 0.61(0.06-5.70)                         |
| 40~                      | 223/227        | 4.24(3.25-5.54)                         | 3.21(2.43-4.25)                         | 2/6            | 1.27(0.25-6.47)                         | 0.65(0.08-5.56)                         |
| <i>P trend</i>           |                | <0.001                                  | <0.001                                  |                | 0.7713                                  | 0.3956                                  |
| Alcohol drinking (g/day) |                |                                         |                                         |                |                                         |                                         |
| Never                    | 286/866        | 1.00                                    | 1.00                                    | 352/1303       | 1.00                                    | 1.00                                    |
| <20                      | 89/207         | 1.30(0.98-1.73)                         | 1.13(0.84-1.51)                         | 8/17           | 1.64(0.69-3.90)                         | 1.75(0.68-4.47)                         |
| 20~                      | 113/132        | 2.59(1.94-3.46)                         | 1.93(1.43-2.61)                         | 1/15           | 0.21(0.03-1.65)                         | 0.48(0.06-3.87)                         |
| 60~                      | 128/103        | 3.74(2.78-5.04)                         | 2.62(1.92-3.58)                         | 1/3            | 1.52(0.16-14.83)                        | -                                       |
| <i>P trend</i>           |                | <0.001                                  | <0.001                                  |                | 0.5501                                  | 0.6765                                  |
| Passive smoking          |                |                                         |                                         |                |                                         |                                         |
| No                       | 93/417         | 1.00                                    | 1.00                                    | 182/838        | 1.00                                    | 1.00                                    |
| Yes                      | 60/206         | 1.43(0.97-2.11)                         | 1.44(0.98-2.12)                         | 176/482        | 1.84(1.44-2.35)                         | 1.74(1.36-2.23)                         |
| Tea consumption          |                |                                         |                                         |                |                                         |                                         |
| No                       | 316/602        | 1.00                                    | 1.00                                    | 304/1032       | 1.00                                    | 1.00                                    |
| Yes                      | 300/706        | 0.79(0.65-0.96)                         | 0.53(0.43-0.66)                         | 58/306         | 0.59(0.43-0.81)                         | 0.62(0.45-0.86)                         |
| Tea concentration        |                |                                         |                                         |                |                                         |                                         |
| Never drinker            | 316/602        | 1.00                                    | 1.00                                    | 304/1057       | 1.00                                    | 1.00                                    |
| Light tea                | 82/195         | 0.77(0.57-1.04)                         | 0.67(0.49-0.91)                         | 24/105         | 0.65(0.40-1.05)                         | 0.67(0.41-1.08)                         |
| Moderate tea             | 103/338        | 0.57(0.43-0.74)                         | 0.49(0.38-0.65)                         | 23/140         | 0.53(0.33-0.84)                         | 0.60(0.37-0.97)                         |
| Strong tea               | 115/173        | 1.24(0.94-1.63)                         | 0.97(0.73-1.30)                         | 11/36          | 1.10(0.55-2.21)                         | 1.16(0.57-2.37)                         |
| Tea types                |                |                                         |                                         |                |                                         |                                         |
| Never drinker            | 316/602        | 1.00                                    | 1.00                                    | 304/1057       | 1.00                                    | 1.00                                    |
| Black-tea                | 24/74          | 0.65(0.40-1.06)                         | 0.46(0.27-0.76)                         | 7/36           | 0.68(0.29-1.55)                         | 0.77(0.33-1.77)                         |
| Green-tea                | 165/391        | 0.81(0.64-1.02)                         | 0.55(0.43-0.71)                         | 32/166         | 0.59(0.39-0.89)                         | 0.64(0.42-0.97)                         |
| Oolong-tea               | 104/227        | 0.80(0.60-1.05)                         | 0.53(0.39-0.71)                         | 16/66          | 0.74(0.41-1.31)                         | 0.78(0.43-1.40)                         |
| Others                   | 7/14           | 0.90(0.36-2.29)                         | 0.65(0.24-1.73)                         | 3/13           | 0.73(0.20-2.61)                         | 0.85(0.23-3.08)                         |
| Tea temperature          |                |                                         |                                         |                |                                         |                                         |
| Never drinker            | 316/602        | 1.00                                    | 1.00                                    | 304/1057       | 1.00                                    | 1.00                                    |
| Cold tea                 | 20/61          | 0.64(0.37-1.08)                         | 0.48(0.28-0.83)                         | 3/13           | 1.02(0.29-3.65)                         | 1.18(0.33-4.23)                         |
| Warm tea                 | 92/339         | 0.51(0.39-0.67)                         | 0.40(0.30-0.54)                         | 32/172         | 0.58(0.39-0.88)                         | 0.63(0.42-0.96)                         |
| Hot tea                  | 188/306        | 1.12(0.88-1.41)                         | 0.78(0.61-1.00)                         | 23/96          | 0.70(0.43-1.14)                         | 0.76(0.46-1.24)                         |

<sup>a</sup> Adjustment for age, education, marital status, residence, family history of cancer.

<sup>b</sup> Additional adjustment for smoking and alcohol drinking.

<sup>c</sup> Additional adjustment for passive smoking and cooking oil fumes.

Supplementary Table 2 Dietary factors and the risk of oral cancer

| Variable                         | Men            |                                                    |                                                    | Women          |                                                    |                                                    |
|----------------------------------|----------------|----------------------------------------------------|----------------------------------------------------|----------------|----------------------------------------------------|----------------------------------------------------|
|                                  | Cases/Controls | Model-1<br><i>OR</i> (95% <i>CI</i> ) <sup>a</sup> | Model-2<br><i>OR</i> (95% <i>CI</i> ) <sup>b</sup> | Cases/Controls | Model-1<br><i>OR</i> (95% <i>CI</i> ) <sup>a</sup> | Model-2<br><i>OR</i> (95% <i>CI</i> ) <sup>c</sup> |
| <b>Red meat</b>                  |                |                                                    |                                                    |                |                                                    |                                                    |
| <3times/week                     | 266/565        | 1.00                                               | 1.00                                               | 217/761        | 1.00                                               | 1.00                                               |
| ≥3times/week                     | 350/743        | 0.98(0.80-1.20)                                    | 0.90(0.73-1.11)                                    | 145/577        | 0.85(0.67-1.10)                                    | 0.81(0.63-1.05)                                    |
| <b>Domestic meat</b>             |                |                                                    |                                                    |                |                                                    |                                                    |
| <1time/week                      | 221/438        | 1.00                                               | 1.00                                               | 165/579        | 1.00                                               | 1.00                                               |
| ≥1time/week                      | 395/870        | 0.89(0.72-1.09)                                    | 0.91(0.73-1.13)                                    | 197/759        | 0.85(0.67-1.08)                                    | 0.88(0.69-1.13)                                    |
| <b>Fish</b>                      |                |                                                    |                                                    |                |                                                    |                                                    |
| <3times/week                     | 325/515        | 1.00                                               | 1.00                                               | 200/660        | 1.00                                               | 1.00                                               |
| ≥3times/week                     | 291/793        | 0.54(0.45-0.66)                                    | 0.52(0.42-0.64)                                    | 162/678        | 0.69(0.54-0.88)                                    | 0.70(0.54-0.90)                                    |
| <b>Seafood</b>                   |                |                                                    |                                                    |                |                                                    |                                                    |
| <1time/week                      | 274/391        | 1.00                                               | 1.00                                               | 162/524        | 1.00                                               | 1.00                                               |
| ≥1time/week                      | 342/917        | 0.50(0.41-0.61)                                    | 0.49(0.39-0.60)                                    | 200/814        | 0.67(0.53-0.86)                                    | 0.75(0.58-0.97)                                    |
| <b>Milk and dairy products</b>   |                |                                                    |                                                    |                |                                                    |                                                    |
| <1time/week                      | 420/712        | 1.00                                               | 1.00                                               | 216/779        | 1.00                                               | 1.00                                               |
| ≥1time/week                      | 196/596        | 0.56(0.46-0.69)                                    | 0.62(0.50-0.78)                                    | 146/559        | 0.81(0.63-1.04)                                    | 0.84(0.65-1.09)                                    |
| <b>Eggs</b>                      |                |                                                    |                                                    |                |                                                    |                                                    |
| <3times/week                     | 295/487        | 1.00                                               | 1.00                                               | 181/572        | 1.00                                               | 1.00                                               |
| ≥3times/week                     | 321/821        | 0.65(0.53-0.79)                                    | 0.69(0.56-0.85)                                    | 181/766        | 0.70(0.55-0.88)                                    | 0.71(0.56-0.91)                                    |
| <b>Vegetables</b>                |                |                                                    |                                                    |                |                                                    |                                                    |
| <1time/day                       | 110/59         | 1.00                                               | 1.00                                               | 39/56          | 1.00                                               | 1.00                                               |
| ≥1time/day                       | 506/1249       | 0.22(0.15-0.30)                                    | 0.25(0.17-0.35)                                    | 323/1282       | 0.37(0.24-0.57)                                    | 0.40(0.26-0.62)                                    |
| <b>Fruits</b>                    |                |                                                    |                                                    |                |                                                    |                                                    |
| <3times/week                     | 458/569        | 1.00                                               | 1.00                                               | 185/427        | 1.00                                               | 1.00                                               |
| ≥3times/week                     | 158/739        | 0.25(0.20-0.32)                                    | 0.31(0.25-0.39)                                    | 177/911        | 0.40(0.32-0.52)                                    | 0.43(0.34-0.56)                                    |
| <b>Beans</b>                     |                |                                                    |                                                    |                |                                                    |                                                    |
| <1time/week                      | 211/376        | 1.00                                               | 1.00                                               | 116/346        | 1                                                  | 1                                                  |
| ≥1time/week                      | 405/932        | 0.77(0.62-0.95)                                    | 0.75(0.60-0.93)                                    | 246/992        | 0.68(0.53-0.89)                                    | 0.66(0.50-0.86)                                    |
| <b>Pickled food</b>              |                |                                                    |                                                    |                |                                                    |                                                    |
| <1time/week                      | 422/946        | 1.00                                               | 1.00                                               | 258/1012       | 1.00                                               | 1.00                                               |
| ≥1time/week                      | 194/362        | 1.16(0.94-1.43)                                    | 1.10(0.88-1.37)                                    | 104/326        | 1.17(0.89-1.52)                                    | 1.09(0.83-1.44)                                    |
| <b>Cooking oil fume exposure</b> |                |                                                    |                                                    |                |                                                    |                                                    |
| Light and below                  | 463/1055       | 1.00                                               | 1.00                                               | 245/1090       | 1.00                                               | 1.00                                               |
| Middle                           | 121/219        | 1.22(0.95-1.58)                                    | 1.27(0.98-1.65)                                    | 98/225         | 2.01(1.52-2.67)                                    | 1.92(1.45-2.56)                                    |
| Heavy                            | 20/34          | 1.44(0.81-2.53)                                    | 1.16(0.63-2.14)                                    | 13/23          | 2.91(1.43-5.89)                                    | 2.49(1.20-5.15)                                    |
| <i>P trend</i>                   |                | 0.1362                                             | 0.5466                                             |                | <0.001                                             | <0.001                                             |

<sup>a</sup> Adjustment for age, education, marital status, residence, family history of cancer.

<sup>b</sup> Additional adjustment for smoking and alcohol drinking.

<sup>c</sup> Additional adjustment for passive smoking and cooking oil fumes.

Supplementary Table 3 Oral hygiene related factors, sexual habit and the risk of oral cancer

| Variable                          | Men            |                                                    |                                                    | Women          |                                                    |                                                    |
|-----------------------------------|----------------|----------------------------------------------------|----------------------------------------------------|----------------|----------------------------------------------------|----------------------------------------------------|
|                                   | Cases/Controls | Model-1<br><i>OR</i> (95% <i>CI</i> ) <sup>a</sup> | Model-2<br><i>OR</i> (95% <i>CI</i> ) <sup>b</sup> | Cases/Controls | Model-1<br><i>OR</i> (95% <i>CI</i> ) <sup>a</sup> | Model-2<br><i>OR</i> (95% <i>CI</i> ) <sup>c</sup> |
| Tooth-brushing(times/day)         |                |                                                    |                                                    |                |                                                    |                                                    |
| <2                                | 427/756        | 1.00                                               | 1.00                                               | 178/586        | 1.00                                               | 1.00                                               |
| ≥2                                | 189/552        | 0.59(0.47-0.73)                                    | 0.70(0.56-0.88)                                    | 184/752        | 0.75(0.58-0.95)                                    | 0.76(0.59-0.98)                                    |
| Teeth loss                        |                |                                                    |                                                    |                |                                                    |                                                    |
| 0                                 | 174/540        | 1.00                                               | 1.00                                               | 84/443         | 1.00                                               | 1.00                                               |
| <5                                | 189/343        | 1.93(1.49-2.51)                                    | 1.74(1.33-2.29)                                    | 100/359        | 1.62(1.16-2.27)                                    | 1.61(1.14-2.27)                                    |
| ≥5                                | 253/425        | 2.39(1.82-3.13)                                    | 1.93(1.45-2.56)                                    | 178/536        | 2.15(1.53-3.01)                                    | 2.19(1.55-3.09)                                    |
| <i>P trend</i>                    |                | <0.001                                             | <0.001                                             |                | <0.001                                             | <0.001                                             |
| Denture wearing                   |                |                                                    |                                                    |                |                                                    |                                                    |
| No                                | 347/867        | 1.00                                               | 1.00                                               | 161/715        | 1.00                                               | 1.00                                               |
| Yes                               | 269/441        | 1.68(1.35-2.07)                                    | 1.43(1.14-1.79)                                    | 201/623        | 1.43(1.11-1.85)                                    | 1.46(1.13-1.90)                                    |
| Regular dental visits(times/year) |                |                                                    |                                                    |                |                                                    |                                                    |
| Never                             | 553/1095       | 1.00                                               | 1.00                                               | 308/1078       | 1.00                                               | 1.00                                               |
| <1                                | 47/138         | 0.60(0.42-0.85)                                    | 0.58(0.40-0.84)                                    | 43/187         | 0.57(0.39-0.83)                                    | 0.51(0.34-0.75)                                    |
| ≥1                                | 16/75          | 0.39(0.23-0.69)                                    | 0.43(0.24-0.75)                                    | 11/73          | 0.42(0.22-0.81)                                    | 0.46(0.23-0.89)                                    |
| <i>P trend</i>                    |                | <0.001                                             | <0.001                                             |                | <0.001                                             | <0.001                                             |
| Repetitive dental ulcer           |                |                                                    |                                                    |                |                                                    |                                                    |
| No                                | 570/1278       | 1.00                                               | 1.00                                               | 310/1298       | 1.00                                               | 1.00                                               |
| Yes                               | 46/30          | 3.42(2.13-5.51)                                    | 3.98(2.41-6.56)                                    | 52/40          | 5.20(3.35-8.06)                                    | 5.37(3.40-8.49)                                    |
| Age of first intercourse          |                |                                                    |                                                    |                |                                                    |                                                    |
| >22                               | 443/910        | 1.00                                               | 1.00                                               | 162/682        | 1.00                                               | 1.00                                               |
| ≤22                               | 163/279        | 1.20(0.96-1.50)                                    | 1.10(0.86-1.40)                                    | 189/584        | 1.36(1.07-1.73)                                    | 1.59(1.21-2.09)                                    |
| Missing                           | 10/119         |                                                    |                                                    | 11/72          | -                                                  | -                                                  |

<sup>a</sup> Adjustment for age, education, marital status, residence, family history of cancer.

<sup>b</sup> Additional adjustment for smoking and alcohol drinking.

<sup>c</sup> Additional adjustment for passive smoking and cooking oil fumes.
